# Supplementary material for: Pancreas volumes in humans from birth to age one hundred taking into account sex, obesity, and presence of type-2 diabetes
Source: PubMed Central journal article supplement (PMC2680737; doi:10.1002/ca.20543), 2007-09-18
Supplement: ca0020-0933-SD1.pdf [file ca0020-0933-SD1.pdf]

## Appendix for Online Publication

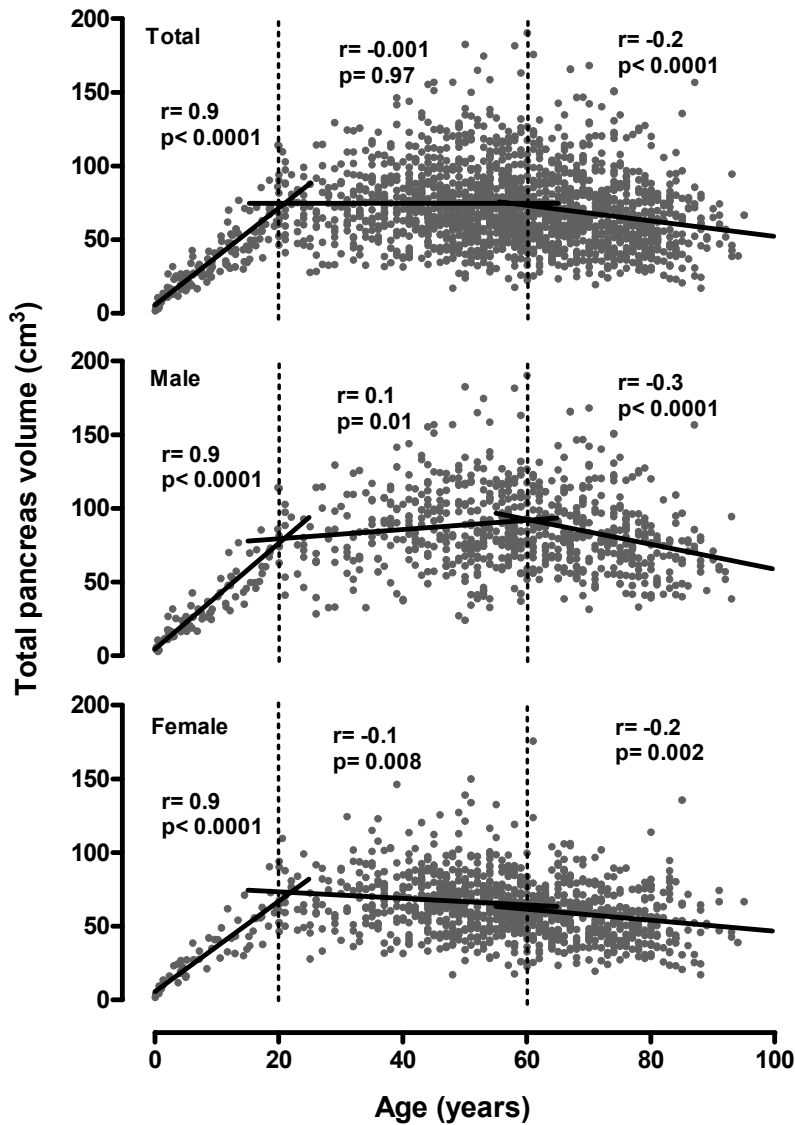

**Supplementary Figure 1.** Distribution of total pancreas volume from birth to age 100 years. There is a strong correlation between age and total pancreas volume from birth to age 20 years ( $y$  (volume;  $\text{cm}^3$ ) =  $5.5 + 3.31x$  (age; years),  $y = 4.5 + 3.60x$ , and  $y = 6.2 + 3.06x$  in total, male, and female groups, respectively). There is a negative correlation between age and total pancreas volume after age 60 years ( $y = 106.0 - 0.53x$ ,  $y = 143.4 - 0.85x$ , and  $y = 83.1 - 0.37x$  in total, male, and female groups, respectively). There is no marked correlation between age and total pancreas volume from age 20 to 60 years.

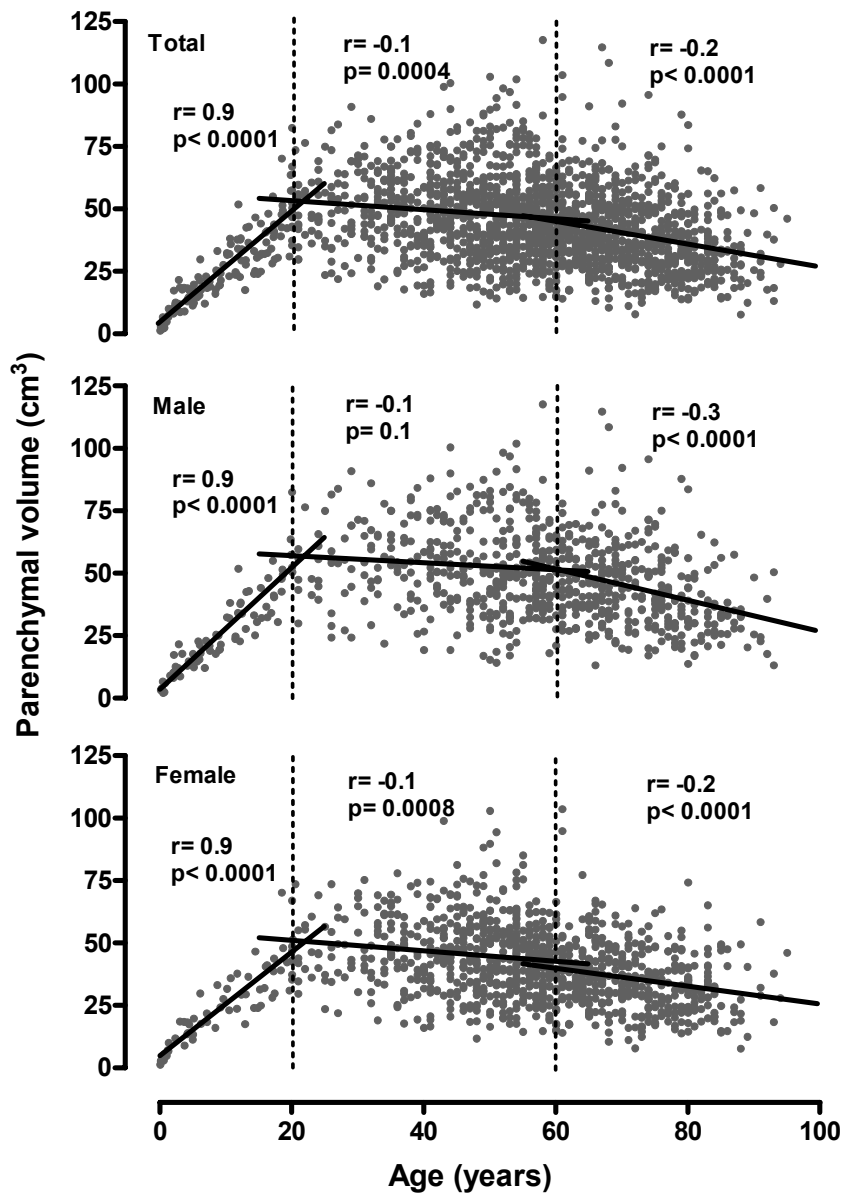

**Supplementary Figure 2.** Distribution of parenchymal volume from birth to age 100 years. There is a strong correlation between age and parenchymal volume from birth to age 20 years ( $y$  (volume;  $\text{cm}^3$ ) =  $4.3 + 2.25x$  (age; years),  $y = 3.4 + 2.44x$ , and  $y = 4.9 + 2.08x$  in total, male, and female groups, respectively). There is a negative correlation between age and parenchymal volume after age 60 years ( $y = 71.7 - 0.45x$ ,  $y = 88.7 - 0.62x$ , and  $y = 60.4 - 0.35x$  in total, male, and female groups, respectively). There is significant, but weak negative correlation between age and parenchymal volume from age 20 to 60 years.

**Supplementary Table 1. Growth of Pancreas in Childhood and Adolescence**

| Age (years)           | n          | Pancreas volume (cm <sup>3</sup> ) |                |                | Fat/ Parenchyma ratio |
|-----------------------|------------|------------------------------------|----------------|----------------|-----------------------|
|                       |            | Total                              | Parenchyma     | Fat            |                       |
| <b>Total subjects</b> | <b>135</b> |                                    |                |                |                       |
| 0 - 2.5               | 30         | 8.9 ± 5.7                          | 6.0 ± 3.9      | 2.9 ± 2.0      | 0.49 ± 0.20           |
| 2.5 - 5               | 16         | 20.1 ± 5.7 **                      | 14.5 ± 3.9 **  | 5.6 ± 2.2      | 0.39 ± 0.11           |
| 5 - 10                | 27         | 28.7 ± 7.6 *                       | 20.3 ± 5.1 *   | 8.4 ± 4.0      | 0.42 ± 0.17           |
| 10 - 15               | 29         | 45.7 ± 12.8 **                     | 32.1 ± 8.0 **  | 13.6 ± 6.1 **  | 0.42 ± 0.14           |
| 15 - 20               | 33         | 64.1 ± 18.0 **                     | 43.1 ± 11.8 ** | 21.0 ± 9.3 **  | 0.50 ± 0.21           |
| <b>Male</b>           | <b>77</b>  |                                    |                |                |                       |
| 0 - 2.5               | 18         | 9.7 ± 6.4                          | 6.5 ± 4.3      | 3.2 ± 2.3      | 0.51 ± 0.18           |
| 2.5 - 5               | 8          | 19.9 ± 6.6 *                       | 13.9 ± 4.3 *   | 6.0 ± 2.6      | 0.43 ± 0.12           |
| 5 - 10                | 17         | 27.4 ± 7.0                         | 19.2 ± 4.0     | 8.3 ± 4.2      | 0.43 ± 0.18           |
| 10 - 15               | 17         | 47.4 ± 12.5 **                     | 33.6 ± 7.8 **  | 13.8 ± 6.2 **  | 0.41 ± 0.13           |
| 15 - 20               | 17         | 68.0 ± 16.9 **                     | 44.5 ± 9.6 **  | 23.5 ± 10.0 ** | 0.53 ± 0.19           |
| <b>Female</b>         | <b>58</b>  |                                    |                |                |                       |
| 0 - 2.5               | 12         | 7.6 ± 4.3                          | 5.3 ± 3.2      | 2.3 ± 1.4      | 0.46 ± 0.23           |
| 2.5 - 5               | 8          | 20.2 ± 5.0 *                       | 15.1 ± 3.7 *   | 5.2 ± 1.7      | 0.34 ± 0.08           |
| 5 - 10                | 10         | 31.0 ± 8.5                         | 22.2 ± 6.4     | 8.8 ± 3.6      | 0.41 ± 0.18           |
| 10 - 15               | 12         | 43.3 ± 13.5 *                      | 30.0 ± 8.2 *   | 13.3 ± 6.2     | 0.44 ± 0.16           |
| 15 - 20               | 16         | 60.0 ± 18.7 **                     | 41.6 ± 13.9 ** | 18.4 ± 7.9 *   | 0.46 ± 0.23           |

Values are means ± SD. \* p< 0.05, \*\* p< 0.01 vs. younger population.

**Supplementary Table 2. Effects of Age on Pancreas Volume in Adulthood**

| Age (years)                            | n           | BMI (kg/m <sup>2</sup> ) |   |     | Pancreas volume (cm <sup>3</sup> ) |      |      |            |     |      |      |      |      | Fat/ Parenchyma ratio |      |      |      |      |      |      |      |
|----------------------------------------|-------------|--------------------------|---|-----|------------------------------------|------|------|------------|-----|------|------|------|------|-----------------------|------|------|------|------|------|------|------|
|                                        |             |                          |   |     | Total                              |      |      | Parenchyma |     |      | Fat  |      |      |                       |      |      |      |      |      |      |      |
| <b>Total subjects</b>                  | <b>1721</b> |                          |   |     |                                    |      |      |            |     |      |      |      |      |                       |      |      |      |      |      |      |      |
| 20 - 29                                | 80          | 24.0                     | ± | 5.0 | 69.8                               | ±    | 21.4 | 49.6       | ±   | 14.9 | 20.2 | ±    | 11.4 | 0.42                  | ±    | 0.26 |      |      |      |      |      |
| 30 - 39                                | 142         | 25.4                     | ± | 5.1 | *                                  | 77.6 | ±    | 23.5       | *   | 51.5 | ±    | 15.3 | 26.1 | ±                     | 14.0 | **   | 0.54 | ±    | 0.31 | *    |      |
| 40 - 49                                | 282         | 25.9                     | ± | 5.4 | **                                 | 77.8 | ±    | 25.0       | *   | 49.5 | ±    | 16.5 | 28.3 | ±                     | 15.1 | **   | 0.62 | ±    | 0.35 | **   |      |
| 50 - 59                                | 430         | 25.6                     | ± | 4.5 | **                                 | 75.0 | ±    | 26.4       |     | 47.3 | ±    | 16.6 | ¶    | 27.8                  | ±    | 15.4 | **   | 0.63 | ±    | 0.36 | **§  |
| 60 - 69                                | 364         | 26.0                     | ± | 5.0 | **                                 | 72.4 | ±    | 26.2       | §†  | 42.7 | ±    | 15.5 | **¶  | 29.7                  | ±    | 16.2 | **§  | 0.74 | ±    | 0.41 | **¶† |
| 70 - 79                                | 277         | 25.0                     | ± | 4.5 | †                                  | 67.0 | ±    | 26.2       | ¶   | 38.2 | ±    | 14.7 | **¶  | 28.8                  | ±    | 17.2 | **   | 0.82 | ±    | 0.55 | **¶  |
| 80 - 89                                | 131         | 24.0                     | ± | 3.9 | §                                  | 60.6 | ±    | 23.1       | **¶ | 33.1 | ±    | 12.8 | **¶  | 27.5                  | ±    | 16.3 | **   | 0.91 | ±    | 0.61 | **¶  |
| 90-                                    | 15          | 22.9                     | ± | 3.6 | †                                  | 58.7 | ±    | 15.2       | ¶   | 32.8 | ±    | 13.5 | **¶  | 25.9                  | ±    | 11.3 |      | 0.98 | ±    | 0.63 | **¶  |
| <b>Male</b>                            | <b>724</b>  |                          |   |     |                                    |      |      |            |     |      |      |      |      |                       |      |      |      |      |      |      |      |
| 20 - 29                                | 37          | 24.5                     | ± | 4.4 |                                    | 75.8 | ±    | 24.7       |     | 53.9 | ±    | 17.2 |      | 21.9                  | ±    | 12.5 |      | 0.42 | ±    | 0.24 |      |
| 30 - 39                                | 57          | 27.0                     | ± | 4.3 | **                                 | 85.8 | ±    | 23.5       |     | 56.4 | ±    | 14.9 |      | 29.4                  | ±    | 14.2 | *    | 0.54 | ±    | 0.28 |      |
| 40 - 49                                | 99          | 26.9                     | ± | 4.2 | **                                 | 93.5 | ±    | 26.9       | **  | 54.9 | ±    | 17.5 |      | 38.5                  | ±    | 17.5 | **¶  | 0.76 | ±    | 0.39 | **¶  |
| 50 - 59                                | 179         | 26.0                     | ± | 3.9 | *                                  | 88.2 | ±    | 28.6       | **  | 51.6 | ±    | 18.0 |      | 36.6                  | ±    | 16.8 | **¶  | 0.76 | ±    | 0.35 | **¶  |
| 60 - 69                                | 163         | 26.9                     | ± | 4.7 | **                                 | 87.0 | ±    | 25.2       | *   | 47.8 | ±    | 16.2 | ¶†   | 39.2                  | ±    | 16.1 | **¶  | 0.90 | ±    | 0.42 | **¶  |
| 70 - 79                                | 123         | 25.3                     | ± | 3.6 | ¶†                                 | 83.1 | ±    | 27.4       | †   | 43.8 | ±    | 15.9 | **¶  | 39.3                  | ±    | 18.7 | **¶  | 0.98 | ±    | 0.53 | **¶  |
| 80 - 89                                | 58          | 24.2                     | ± | 3.4 | ¶                                  | 70.1 | ±    | 21.3       | ¶   | 35.6 | ±    | 13.1 | **¶  | 34.5                  | ±    | 15.7 | **   | 1.09 | ±    | 0.65 | **¶  |
| 90-                                    | 8           | 22.4                     | ± | 1.6 | ¶                                  | 62.2 | ±    | 16.2       | §   | 30.3 | ±    | 14.1 | **¶  | 31.9                  | ±    | 9.2  |      | 1.28 | ±    | 0.62 | **¶  |
| <b>Female</b>                          | <b>997</b>  |                          |   |     |                                    |      |      |            |     |      |      |      |      |                       |      |      |      |      |      |      |      |
| 20 - 29                                | 43          | 23.5                     | ± | 5.4 |                                    | 64.6 | ±    | 16.6       |     | 45.9 | ±    | 11.6 |      | 18.7                  | ±    | 10.3 |      | 0.43 | ±    | 0.27 |      |
| 30 - 39                                | 85          | 24.3                     | ± | 5.3 |                                    | 72.1 | ±    | 22.0       | *   | 48.3 | ±    | 14.7 |      | 23.8                  | ±    | 13.5 |      | 0.53 | ±    | 0.33 |      |
| 40 - 49                                | 183         | 25.4                     | ± | 5.9 |                                    | 69.4 | ±    | 19.3       |     | 46.6 | ±    | 15.3 |      | 22.8                  | ±    | 10.0 |      | 0.54 | ±    | 0.30 |      |
| 50 - 59                                | 251         | 25.4                     | ± | 4.8 |                                    | 65.6 | ±    | 20.0       | ¶   | 44.2 | ±    | 14.8 | §    | 21.5                  | ±    | 10.5 |      | 0.53 | ±    | 0.33 |      |
| 60 - 69                                | 201         | 25.2                     | ± | 5.1 |                                    | 60.5 | ±    | 20.5       | ¶   | 38.6 | ±    | 13.7 | **¶  | 21.9                  | ±    | 11.5 |      | 0.61 | ±    | 0.34 | **   |
| 70 - 79                                | 154         | 24.8                     | ± | 5.1 |                                    | 54.1 | ±    | 16.4       | **¶ | 33.7 | ±    | 12.0 | **¶  | 20.4                  | ±    | 9.7  |      | 0.70 | ±    | 0.53 | **¶  |
| 80 - 89                                | 73          | 23.9                     | ± | 4.3 |                                    | 53.0 | ±    | 21.7       | **¶ | 31.1 | ±    | 12.3 | **¶  | 22.0                  | ±    | 14.6 |      | 0.77 | ±    | 0.54 | **¶  |
| 90-                                    | 7           | 23.5                     | ± | 5.2 |                                    | 54.7 | ±    | 14.1       | §   | 35.7 | ±    | 13.2 | §†   | 19.0                  | ±    | 9.9  |      | 0.63 | ±    | 0.47 |      |
| Values are means ± SD.                 |             |                          |   |     |                                    |      |      |            |     |      |      |      |      |                       |      |      |      |      |      |      |      |
| * p < 0.05, ** p < 0.01 vs. age 20-29. |             |                          |   |     |                                    |      |      |            |     |      |      |      |      |                       |      |      |      |      |      |      |      |
| § p < 0.05, ¶ p < 0.01 vs. age 30-39.  |             |                          |   |     |                                    |      |      |            |     |      |      |      |      |                       |      |      |      |      |      |      |      |
| † p < 0.05, † p < 0.01 vs. age 40-49.  |             |                          |   |     |                                    |      |      |            |     |      |      |      |      |                       |      |      |      |      |      |      |      |
| p < 0.05,    p < 0.01 vs. age 50-59.   |             |                          |   |     |                                    |      |      |            |     |      |      |      |      |                       |      |      |      |      |      |      |      |

**Supplementary Table 3. Effects of BMI on Pancreas Volume in Adulthood**

|                       | n           | Age (years) | BMI (kg/m <sup>2</sup> ) | Pancreas volume (cm <sup>3</sup> ) |                |                  | Fat/ Parenchyma ratio |
|-----------------------|-------------|-------------|--------------------------|------------------------------------|----------------|------------------|-----------------------|
|                       |             |             |                          | Total                              | Parenchyma     | Fat              |                       |
| <b>Total subjects</b> | <b>1150</b> |             |                          |                                    |                |                  |                       |
| Lean                  | 460         | 57 ± 14     | 22.1 ± 1.8               | 66.2 ± 22.0                        | 43.2 ± 15.7    | 23.0 ± 12.4      | 0.59 ± 0.37           |
| Overweight            | 460         | 57 ± 14     | 27.1 ± 1.4 **            | 76.6 ± 23.8 **                     | 46.2 ± 16.2 ** | 30.4 ± 14.3 **   | 0.73 ± 0.45 **        |
| Obese                 | 230         | 57 ± 14     | 33.6 ± 3.4 **§§          | 87.3 ± 30.3 **§§                   | 48.7 ± 18.0 ** | 38.6 ± 18.9 **§§ | 0.86 ± 0.44 **§§      |
| <b>Male</b>           | <b>495</b>  |             |                          |                                    |                |                  |                       |
| Lean                  | 198         | 56 ± 15     | 22.5 ± 1.8               | 77.0 ± 22.7                        | 47.5 ± 16.3    | 29.5 ± 13.5      | 0.68 ± 0.36           |
| Overweight            | 198         | 56 ± 15     | 27.1 ± 1.4 **            | 89.6 ± 23.4 **                     | 50.7 ± 17.1    | 38.9 ± 14.6 **   | 0.85 ± 0.43 **        |
| Obese                 | 99          | 56 ± 15     | 33.3 ± 3.3 **§§          | 103.8 ± 30.9 **§§                  | 54.7 ± 19.2 ** | 49.1 ± 20.5 **§§ | 0.99 ± 0.49 **§§      |
| <b>Female</b>         | <b>655</b>  |             |                          |                                    |                |                  |                       |
| Lean                  | 262         | 58 ± 13     | 21.8 ± 1.7               | 58.1 ± 17.4                        | 39.9 ± 14.4    | 18.1 ± 8.8       | 0.52 ± 0.35           |
| Overweight            | 262         | 59 ± 13     | 27.0 ± 1.4 **            | 66.7 ± 18.9 **                     | 42.8 ± 14.6 *  | 23.9 ± 9.9 **    | 0.63 ± 0.45 **        |
| Obese                 | 131         | 58 ± 14     | 33.9 ± 3.4 **§§          | 74.8 ± 23.1 **§§                   | 44.2 ± 15.7 ** | 30.7 ± 12.7 **§§ | 0.75 ± 0.37 **§§      |

Values are means ± SD. \* p < 0.05, \*\* p < 0.01 vs. lean. § p < 0.05, §§ p < 0.01 vs. overweight.
